# Supplementary material
Source: publisher figshare collection journal article supplement (https://tandf.figshare.com/ndownloader/files/37575929)
Supplement: Supplementary file 1 [file 37575929]

**Supplemental Table 2.** Rank correlations, intraclass correlation coefficients and kappa statistics for patient- physician and physician-physician pairs of scores on PRISM, results presented separated for observations for Crohn (CD) and ulcerative colitis (UC) patients.

| **Questionnaire** | **Patients–Senior physician** | | **Patients–Junior physicians** | | **Senior–Junior physicians** | |
| --- | --- | --- | --- | --- | --- | --- |
|  | **Crohn** | **Ulcerative colitis** | **Crohn** | **Ulcerative colitis** | **Crohn** | **Ulcerative colitis** |
| **PRISM** |  |  |  |  |  |  |
| Number of pairs | 319 | 318 | 82 | 78 | 123 | 103 |
| Rho (95% CI) | 0.357 (0.258-0.450) | 0.460 (0.369-0.543) | 0.512 (0.332-0.656) | 0.411 (0.208-0.581) | 0.783 (0.704-0.843) | 0.654 (0.528-0.753) |
| P value | <0.0001 | <0.0001 | <0.0001 | 0.0002 | <0.0001 | <0.0001 |
| ICC (95% CI) | 0.260 (0.110-0.390) | 0.340 (0.154-0.488) | 0.424 (0.223-0.589) | 0.339 (0.112-0.529) | 0.811 (0.741-0.864) | 0.678 (0.559-0.770) |
| Kappa (95% CI) | 0.170 (0.093-0.247) | 0.180 (0.093-0.266) | 0.246 (0.080-0.413) | 0.250 (0.073-0.428) | 0.652 (0.500-0.803) | 0.467 (0.272-0.661) |

PRISM: Pictorial Representation of Illness and Self Measure; Rho: Spearman’s rho; CI, confidence interval; ICC, intraclass correlation coefficient
